# Supplementary material
Source: PubMed Central journal article supplement (PMC4293440)

## Supplemental data

Article title: Aberrant Histone Acetylation Promotes Mitochondrial Respiratory Suppression  
In the Brain of Alcoholic Rats

Authors' names: Marianna E. Jung and Daniel B. Metzger

Journal name: Journal of Pharmacology and Experimental Therapeutics

Figure legend: The effect of a dextrin diet and a chow pellet diet on body weights and mitochondrial stress.

Male rats (5 months old) were habituated for 7 days after arrival at a vivarium. They were divided into two groups (7 rats/group) based on a dextrin and a chow pellet diet. Body weights were measured every day for two weeks. Immediately thereafter, rats were sacrificed and prefrontal cortex was collected to assess mitochondrial stress by measuring mitochondrial membrane swelling (Jung et al., 2012). Intact mitochondria scatter light at 540 nm wavelength; mitochondrial swelling and rupture reduces mitochondrial light scattering and, thus, absorbance at 540 nm (a faster decline indicates more severe mitochondrial membrane swelling). Neither body weights nor mitochondrial membrane swelling showed a statistically significant difference between the two groups. N=7 rats/group.

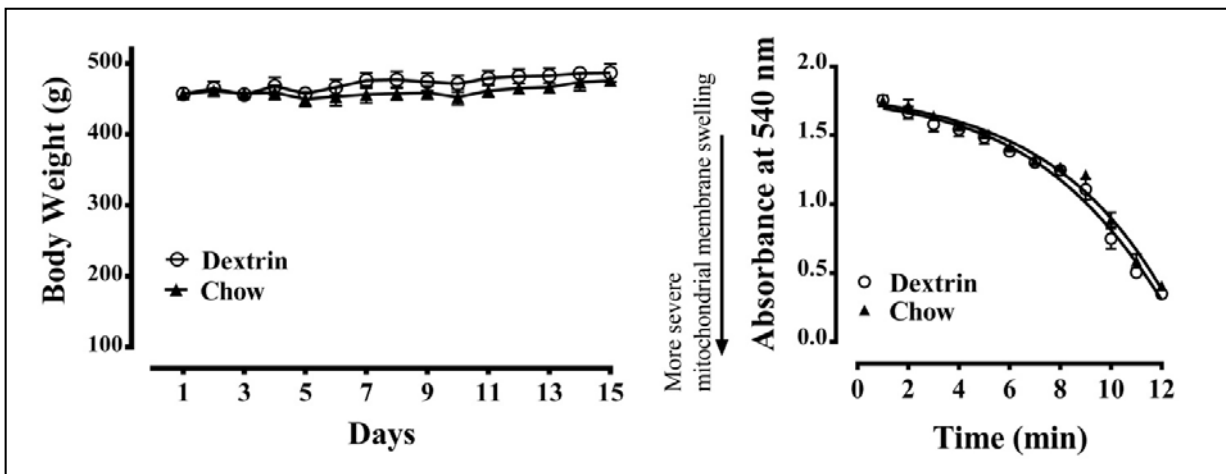

Supplement: supp_114.219311_suppl_figure_219311.pdf [file supp_114.219311_suppl_figure_219311.pdf]
